# Supplementary material
Source: publisher figshare collection journal article supplement (https://sage.figshare.com/ndownloader/files/17384609)
Supplement: Supplementary file 1 [file 17384609]

**Supplementary table:**

| **Rank** | **Author** | **Year** | **Title** | **Citation** |
| --- | --- | --- | --- | --- |
| 1 | O'Sullivan PB | 1997 | Evaluation of Specific Stabilizing Exercise in the Treatment of Chronic Low Back Pain With Radiologic Diagnosis of Spondylolysis or Spondylolisthesis6 | 589 |
| 2 | Herkowitz HN | 1991 | Degenerative Lumbar Spondylolisthesis With Spinal Stenosis - a Prospective-study Comparing Decompression With Decompression and Intertransverse Process Arthrodesis10 | 534 |
| 3 | Fischgrund JS | 1997 | 1997 Volvo Award Winner in Clinical Studies - Degenerative Lumbar Spondylolisthesis With Spinal Stenosis: a Prospective, Randomized Study Comparing Decompressive Laminectomy and Arthrodesis With and Without Spinal Instrumentation11 | 519 |
| 4 | Fredrickson BE | 1984 | The Natural-history of Spondylolysis and Spondylolisthesis17 | 433 |
| 5 | Weinstein JN | 2007 | Surgical Versus Nonsurgical Treatment for Lumbar Degenerative Spondylolisthesis9 | 390 |
| 6 | Bridwell KH | 1993 | The Role of Fusion and Instrumentation in the Treatment of Degenerative Spondylolisthesis With Spinal Stenosis18 | 333 |
| 7 | Wiltse LL | 1976 | Classification of Spondylolisis and Spondylolisthesis19 | 328 |
| 8 | Wiltse LL | 1975 | Fatigue Fracture - Basic Lesion in Isthmic Spondylolisthesis14 | 291 |
| 9 | Weinstein JN | 2009 | Surgical Compared With Nonoperative Treatment for Lumbar Degenerative Spondylolisthesis Four-year Results in the Spine Patient Outcomes Research Trial (sport) Randomized and Observational Cohorts20 | 277 |
| 10 | Boxall D | 1979 | Management of Severe Spondylolisthesis in Children and Adolescents21 | 236 |
| 11 | Mardjetko SM | 1994 | Degenerative Lumbar Spondylolisthesis - a Meta analysis of Literature 1970-199322 | 220 |
| 12 | P. H. Newman | 1963 | The Etiology of Spondylolisthesis23 | 216 |
| 13 | Kornblum MB | 2004 | Degenerative Lumbar Spondylolisthesis With Spinal Stenosis - a Prospective Long-term Study Comparing Fusion and Pseudarthrosis24 | 209 |
| 14 | Wiltse LL | 1983 | Terminology and Measurement of Spondylolisthesis25 | 204 |
| 15 | Lenke LG | 1992 | Results of Insitu Fusion for Isthmic Spondylolisthesis 26 | 174 |
| 16 | WILTSE LL | 1962 | The Etiology of Spondylolisthesis27 | 174 |
| 17 | Rosenberg NJ | 1975 | Degenerative Spondylolisthesis - Predisposing Factors13 | 166 |
| 18 | Beutler WJ | 2003 | The Natural History of Spondylolysis and Spondylolisthesis - 45-year Follow-up Evaluation28 | 165 |
| 19 | Labelle H | 2004 | Spondylolisthesis, Pelvic Incidence, and Spinopelvic Balance - a Correlation Study29 | 159 |
| 20 | Farfan HF | 1976 | The Mechanical Etiology of Spondylolysis and Spondylolisthesis30 | 158 |
| 21 | Möller H | 2000 | Surgery Versus Conservative Management in Adult Isthmic Spondylolisthesis - a Prospective Randomized Study: Part 131 | 157 |
| 22 | GILL GG | 1955 | Surgical Treatment of Spondylolisthesis Without Spine Fusion - Excision of the Loose Lamina With Decompression of the Nerve Roots32 | 154 |
| 23 | Suk SI | 1997 | Adding Posterior Lumbar Interbody Fusion to Pedicle Screw Fixation and Posterolateral Fusion After Decompression in Spondylolytic Spondylolisthesis33 | 153 |
| 24 | Marty C | 2002 | The Sagittal Anatomy of the Sacrum Among Young Adults, Infants, and Spondylolisthesis Patients34 | 141 |
| 25 | Grobler LJ | 1993 | Etiology of Spondylolisthesis. Assessment of the Role Played by Lumbar Facet Joint Morphology.35 | 139 |
| 26 | Tosteson AN | 2008 | Surgical Treatment of Spinal Stenosis With and Without Degenerative Spondylolisthesis: Cost-effectiveness After 2 Years.36 | 138 |
| 27 | Kalichman L | 2009 | Spondylolysis and Spondylolisthesis: Prevalence and Association With Low Back Pain in the Adult Community-based Population.37 | 128 |
| 28 | Ghogawala Z | 2016 | Laminectomy Plus Fusion Versus Laminectomy Alone for Lumbar spondylolisthesis.8 | 124 |
| 29 | Schnake KJ | 2006 | Dynamic Stabilization in Addition to Decompression for Lumbar Spinal Stenosis With Degenerative Spondylolisthesis38 | 122 |
| 30 | Labelle H | 2005 | The Importance of Spino-pelvic Balance in L5-s1 Developmental Spondylolisthesis: a Review of Pertinent Radiologic Measurements.39 | 122 |
| 31 | Hanson DS | 2002 | Correlation of Pelvic Incidence With Low- and High-grade Isthmic spondylolisthesis.40 | 122 |
| 32 | Wang J | 2010 | Comparison of One-level Minimally Invasive and Open transforaminal Lumbar Interbody Fusion in Degenerative and Isthmic spondylolisthesis Grades 1 and 241 | 120 |
| 33 | Collier BD | 1985 | Painful Spondylolysis or Spondylolisthesis Studied by Radiography and Single-photon Emission Computed Tomography 42 | 120 |
| 34 | Miyakoshi N | 2000 | Outcome of One-level Posterior Lumbar Interbody Fusion for Spondylolisthesis and Postoperative Intervertebral Disc degeneration Adjacent to the Fusion43 | 119 |
| 35 | Möller H | 2000 | Instrumented and Noninstrumented Posterolateral Fusion in Adult spondylolisthesis--a Prospective Randomized Study: Part 2.44 | 119 |
| 36 | McGuire RA | 1993 | The Use of Primary Internal Fixation in Spondylolisthesis45 | 116 |
| 37 | Martin CR | 2007 | The Surgical Management of Degenerative Lumbar Spondylolisthesis - a Systematic Review46 | 115 |
| 38 | MacNab I | 1950 | Spondylolisthesis With an Intact Neural Arch; the So-called Pseudo-spondylolisthesis.47 | 115 |
| 39 | Hensinger RN | 1989 | Current Concepts Review – Spondylosis and Spondylolisthesis in Children and Adolescents48 | 114 |
| 40 | Tosteson AN | 2011 | Comparative Effectiveness Evidence from the Spine Patient outcomes Research Trial: Surgical Versus Nonoperative Care for Spinal Stenosis, Degenerative Spondylolisthesis, and Intervertebraldisc Herniation.49 | 113 |
| 41 | Kuntz KM | 2000 | Cost-effectiveness of Fusion With and Without Instrumentation for Patients With Degenerative Spondylolisthesis and Spinal Stenosis.50 | 110 |
| 42 | Matsunaga S | 1990 | Natural-history of Degenerative Spondylolisthesis - Pathogenesis and Natural Course of the Slippage51 | 108 |
| 43 | Norman Capener | 1932 | Spondylolisthesis7 | 108 |
| 44 | Park P | 2008 | Minimally Invasive Transforaminal Lumbar Interbody Fusion With Reduction of Spondylolisthesis: Technique and Outcomes After a Minimum of 2 Years' Follow-up52 | 107 |
| 45 | Anderson PA | 2006 | Treatment of Neurogenic Claudication by Interspinous decompression: Application of the X Stop Device in Patients with Lumbar Degenerative Spondylolisthesis.53 | 107 |
| 46 | Sengupta DK | 2005 | Degenerative Spondylolisthesis - Review of Current Trends and Controversies54 | 107 |
| 47 | Steiner ME | 1985 | Treatment of Symptomatic Spondylolysis and Spondylolisthesis With the Modified Boston Brace55 | 105 |
| 48 | Parker SL | 2011 | Utility of Minimum Clinically Important Difference in Assessing Pain, Disability, and Health State After Transforaminal Lumbar Interbody fusion for Degenerative Lumbar Spondylolisthesis.56 | 104 |
| 49 | Vaccaro AR | 2004 | A Pilot Study Evaluating the Safety and Efficacy of Op-1 Putty(rhbmp-7) as a Replacement for Iliac Crest Autograft in Posterolateral lumbar Arthrodesis for Degenerative Spondylolisthesis.57 | 104 |
| 50 | Turner RH | 1971 | Spondylolysis and Spondylolisthesis in Children and Teen-agers58 | 104 |
| 51 | Schaeren S | 2008 | Minimum Four-year Follow-up of Spinal Stenosis With Degenerative spondylolisthesis Treated With Decompression and Dynamic stabilization.59 | 103 |
| 52 | Kalanithi PS | 2009 | National Complication Rates and Disposition After Posterior Lumbar Fusion for Acquired Spondylolisthesis60 | 102 |
| 53 | Harris IE | 1987 | Long-term Follow-up of Patients With Grade-iii and Grade-iv Spondylolisthesis - Treatment With and Without Posterior Fusion61 | 102 |
| 54 | Lombardi JS | 1985 | Treatment of Degenerative Spondylolisthesis.62 | 101 |
| 55 | Molinari RW | 1999 | Complications in the Surgical Treatment of Pediatric High-grade, Isthmic Dysplastic Spondylolisthesis. a Comparison of Three surgical Approaches.63 | 100 |
| 56 | Jacobsen S | 2007 | Degenerative Lumbar Spondylolisthesis: an Epidemiological perspective: the Copenhagen Osteoarthritis Study.64 | 99 |
| 57 | Madan S | 2002 | Outcome of Posterior Lumbar Interbody Fusion Versus Posterolateral Fusion for Spondylolytic Spondylolisthesis65 | 98 |
| 58 | Wynne-Davies R | 1979 | Inheritance and Spondylolisthesis: a Radiographic Family Survey.66 | 98 |
| 59 | Seitsalo S | 1991 | Progression of Spondylolisthesis in Children and Adolescents - a Long-term Follow-up of 272 Patients67 | 98 |
| 60 | Booth KC | 1999 | Minimum 5-year Results of Degenerative Spondylolisthesis Treated with Decompression and Instrumented Posterior Fusion.68 | 96 |
| 61 | Fitzgerald JA | 1976 | Degenerative Spondylolisthesis.69 | 95 |
| 62 | Deguchi M | 1998 | Posterolateral Fusion for Isthmic Spondylolisthesis in Adults: Analysis of Fusion Rate and Clinical Results.70 | 94 |
| 63 | Jacobs WC | 2006 | Fusion for Low-grade Adult Isthmic Spondylolisthesis: a Systematic Review of the Literature.71 | 93 |
| 64 | Kawakami M | 2002 | Lumbar Sagittal Balance Influences the Clinical Outcome After decompression and Posterolateral Spinal Fusion for Degenerative lumbar Spondylolisthesis.72 | 93 |
| 65 | Poussa M | 1993 | Surgical Treatment of Severe Isthmic Spondylolisthesis in Adolescents. Reduction or Fusion in Situ.73 | 92 |
| 66 | Ishihara H | 2001 | Minimum 10-year Follow-up Study of Anterior Lumbar Interbody fusion for Isthmic Spondylolisthesis.74 | 91 |
| 67 | Herkowitz HN | 1995 | Degenerative Lumbar Spondylolisthesis75 | 91 |
| 68 | Herron LD | 1989 | L4-5 Degenerative Spondylolisthesis. the Results of Treatment by Decompressive Laminectomy Without Fusion.76 | 91 |
| 69 | Verhoof OJ | 2008 | High Failure Rate of the Interspinous Distraction Device (x-stop) for the Treatment of Lumbar Spinal Stenosis Caused by Degenerative Spondylolisthesis77 | 89 |
| 70 | Morscher E | 1984 | Surgical Treatment of Spondylolisthesis by Bone Grafting and Direct Stabilization of Spondylolysis by Means of a Hook Screw.78 | 86 |
| 71 | Hanley EN Jr | 1989 | Surgical Treatment of Isthmic Lumbosacral Spondylolisthesis. Analysis of Variables Influencing Results.79 | 85 |
| 72 | Saraste H | 1987 | Long-term Clinical and Radiological Follow-up of Spondylolysis and Spondylolisthesis80 | 85 |
| 73 | Abdu WA | 2009 | Degenerative Spondylolisthesis Does Fusion Method Influence Outcome? Four-year Results of the Spine Patient Outcomes Research Trial81 | 84 |
| 74 | Barrey C | 2007 | Spinopelvic Alignment of Patients With Degenerative Spondylolisthesis82 | 84 |
| 75 | Rajnics P | 2002 | The Association of Sagittal Spinal and Pelvic Parameters in Asymptomatic Persons and Patients With Isthmic Spondylolisthesis83 | 84 |
| 76 | Feffer HL | 1985 | Degenerative Spondylolisthesis - to Fuse or Not to Fuse84 | 84 |
| 77 | Ghogawala Z | 2004 | Prospective Outcomes Evaluation After Decompression With or Without Instrumented Fusion for Lumbar Stenosis and Degenerative Grade I Spondylolisthesis85 | 83 |
| 78 | Bosworth DM | 1955 | Spondylolisthesis - a Critical Review of a Consecutive Series of Cases Treated by Arthrodesis86 | 83 |
| 79 | Cloward RB | 1981 | Spondylolisthesis - Treatment by Laminectomy and Posterior Interbody Fusion - Review of 100 Cases87 | 82 |
| 80 | Roussouly P | 2006 | Sagittal Alignment of the Spine and Pelvis in the Presence of L5-s1 Isthmic Lysis and Low-grade Spondylolisthesis88 | 80 |
| 81 | Jackson RP | 2003 | Pelvic Lordosis and Alignment in Spondylolisthesis89 | 80 |
| 82 | Lonstein JE | 1999 | Spondylolisthesis in Children - Cause, Natural History, and Management90 | 80 |
| 83 | Johnson JR | 1983 | The Long-term Results of Fusion Insitu for Severe Spondylolisthesis91 | 80 |
| 84 | Shenkin HA | 1979 | Spondylolisthesis After Multiple Bilateral Laminectomies and Facetectomies for Lumbar Spondylosis - Follow-up Review92 | 79 |
| 85 | Lauber S | 2006 | Clinical and Radiologic 2 - 4-year Results of Transforaminal Lumbar Interbody Fusion in Degenerative and Isthmic Spondylolisthesis Grades 1 and 293 | 78 |
| 86 | BOOS N | 1993 | Treatment of Severe Spondylolisthesis by Reduction and Pedicular Fixation - a 4-6-year Follow-up-study94 | 78 |
| 87 | Yan DL | 2008 | Comparative Study of PILF and TLIF Treatment in Adult Degenerative Spondylolisthesis95 | 76 |
| 88 | McCarroll JR | 1986 | Lumbar Spondylolysis and Spondylolisthesis in College Football Players - a Prospective-study96 | 76 |
| 89 | DeWald RL | 1981 | Severe Lumbosacral Spondylolisthesis in Adolescents and Children - Reduction and Staged Circumferential Fusion97 | 76 |
| 90 | Carragee EJ | 1997 | Single-level Posterolateral Arthrodesis, With or Without Posterior Decompression, for the Treatment of Isthmic Spondylolisthesis in Adults - a Prospective, Randomized Study98 | 75 |
| 91 | Bradford DS | 1979 | Treatment of Severe Spondylolisthesis - Combined Approach for Reduction and Stabilization99 | 74 |
| 92 | Burns BH | 1933 | An Operation for Spondylolisthesis100 | 74 |
| 93 | Bradford DS | 1985 | Repair of the Defect in Spondylolysis or Minimal Degrees of Spondylolisthesis by Segmental Wire Fixation and Bone-grafting101 | 72 |
| 94 | Ikata T | 1996 | Pathogenesis of Sports-related Spondylolisthesis in Adolescents - Radiographic and Magnetic Resonance Imaging Study102 | 71 |
| 95 | Ekman P | 2007 | Posterior Lumbar Interbody Fusion Versus Posterolateral Fusion in Adult Isthmic Spondylolisthesis15 | 70 |
| 96 | Cummins J | 2006 | Descriptive epidemiology and prior healthcare utilization of patients in the spine patient outcomes research trial's (SPORT) three observational cohorts - Disc herniation, spinal stenosis, and degenerative spondylolisthesis103 | 69 |
| 97 | Dubousset J | 1997 | Treatment of Spondylolysis and Spondylolisthesis in Children and Adolescents104 | 69 |
| 98 | Rosenberg NJ | 1981 | The Incidence of Spondylolysis and Spondylolisthesis in Non-ambulatory Patients105 | 69 |
| 99 | Min JH | 2007 | [Comparison of anterior- and posterior-approach instrumented lumbar interbody fusion for spondylolisthesis](https://apps.webofknowledge.com/full_record.do?product=WOS&search_mode=GeneralSearch&qid=2&SID=F3F3IX2z1ZUS1wxJsDZ&page=11&doc=102)106 | 68 |
| 100 | Wood KB | 1994 | Radiographic evaluation of instability in spondylolisthesis.107 | 68 |
